# Supplementary material
Source: MDPI journal article supplement (https://www.mdpi.com/2073-4344/14/5/309)
Supplement: s1 [file s1]

# Strong and Hierarchical Ni(OH)<sub>2</sub>/Ni/rGO Composites as Multifunctional Catalysts for Excellent Water Splitting

Lixin Wang <sup>1</sup>, Ailing Song <sup>2,3,\*</sup>, Yue Lu <sup>2</sup>, Manman Duanmu <sup>2</sup>, Zhipeng Ma <sup>2,3</sup>, Xiujuan Qin <sup>2,\*</sup> and Guangjie Shao <sup>2,3</sup>

<sup>1</sup> Shijiazhuang Key Laboratory of Low Carbon Energy Materials, College of Chemical Engineering, Shijiazhuang University, Shijiazhuang 050035, China; 1902003@sjzc.edu.cn

<sup>2</sup> Hebei Key Laboratory of Applied Chemistry, College of Environmental and Chemical Engineering, Yanshan University, Qinhuangdao 066004, China; yueluysu@stumail.ysu.edu.cn (Y.L.); manman.duanmu@stumail.ysu.edu.cn (M.D.); mazp@ysu.edu.cn (Z.M.); shaoguangjie@ysu.edu.cn (G.S.)

<sup>3</sup> State Key Laboratory of Metastable Materials Science and Technology, Yanshan University, Qinhuangdao 066004, China

\* Correspondence: ailing.song@ysu.edu.cn (A.S.); qinxj@ysu.edu.cn (X.Q.)

## Preparation of Ni/rGO composite catalyst

In a classic experiment, GO was prepared by modified Hummers method. In this work, the Ni/rGO composite electrodes were prepared by supergravity electrodeposition, and the configuration of equipment is presented in our published paper [1]. Firstly, a  $\varnothing 10\text{ cm} \times 2\text{ cm}$  Ni foam circle was cleaned sequentially in HCl solution (15%), acetone and DI water for 5 min with ultrasonication to use as cathode. And a pure nickel pipe was used as anode. The Ni/rGO composite coatings were electrodeposited in a blackish green plating bath which contained  $350\text{ g L}^{-1}\text{ Ni}(\text{NH}_2\text{SO}_3)_2 \cdot 6\text{H}_2\text{O}$ ,  $10\text{ g L}^{-1}\text{ NiCl}_2 \cdot 6\text{H}_2\text{O}$ ,  $30\text{ g L}^{-1}\text{ NH}_4\text{Cl}$  with  $1.0\text{ g L}^{-1}\text{ GO}$ , respectively. The pH value of the plating bath is 3.5–3.8. All composite electrodes were performed under the strength of the supergravity with  $G=350\text{ g}$  at a current density of  $3\text{ A dm}^{-2}$  for 60 min at 318 K. Afterwards the Ni foam coated with Ni/rGO hybrid was taken out of the reaction vessel, followed by washed with deionized water to remove physical adsorption residua, and then dried at  $80\text{ }^\circ\text{C}$ .

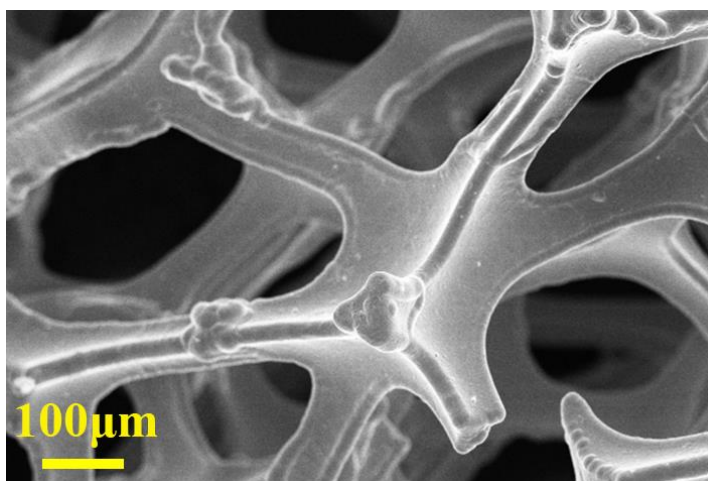

Figure S1. Low-magnification SEM images of Ni foam.

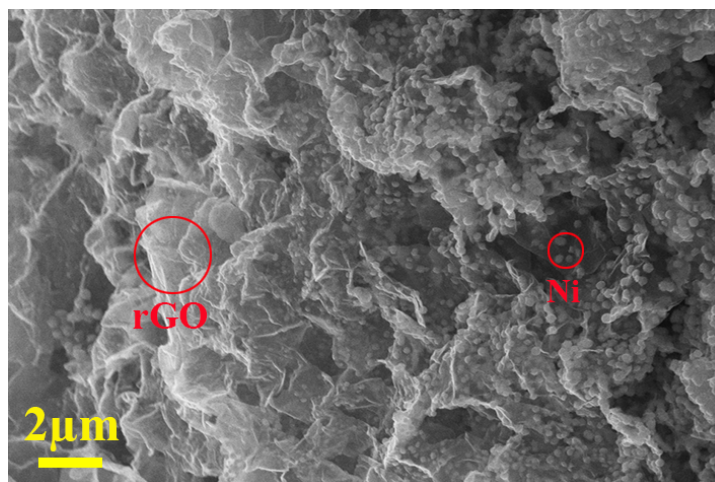

**Figure S2.** High-magnification SEM image of Ni/rGO composite catalyst.

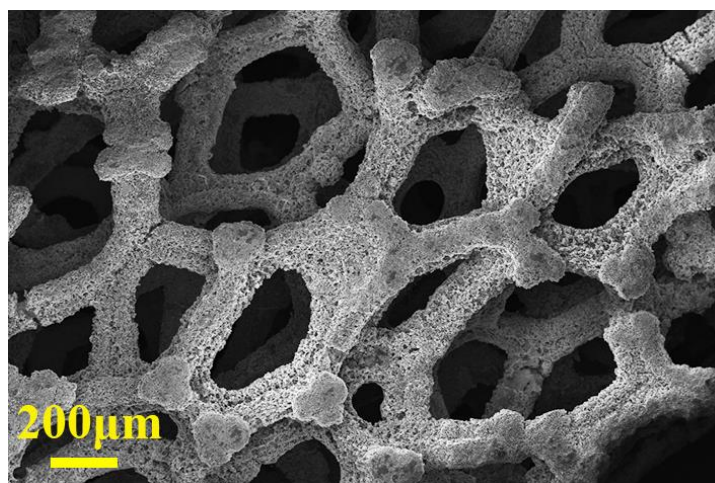

**Figure S3.** Low-magnification SEM images of Ni(OH)<sub>2</sub>/Ni/rGO-1 composite catalyst.

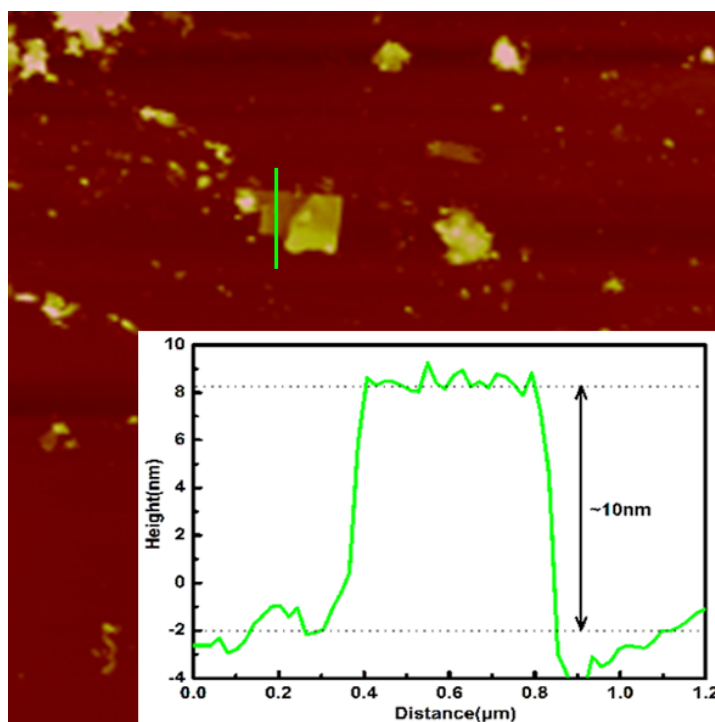

**Figure S4.** AFM image of Ni(OH)<sub>2</sub> nanosheets spalled off Ni(OH)<sub>2</sub>/Ni/rGO-1 catalyst (with 1 h sonication), and inset image is corresponding AFM height image.

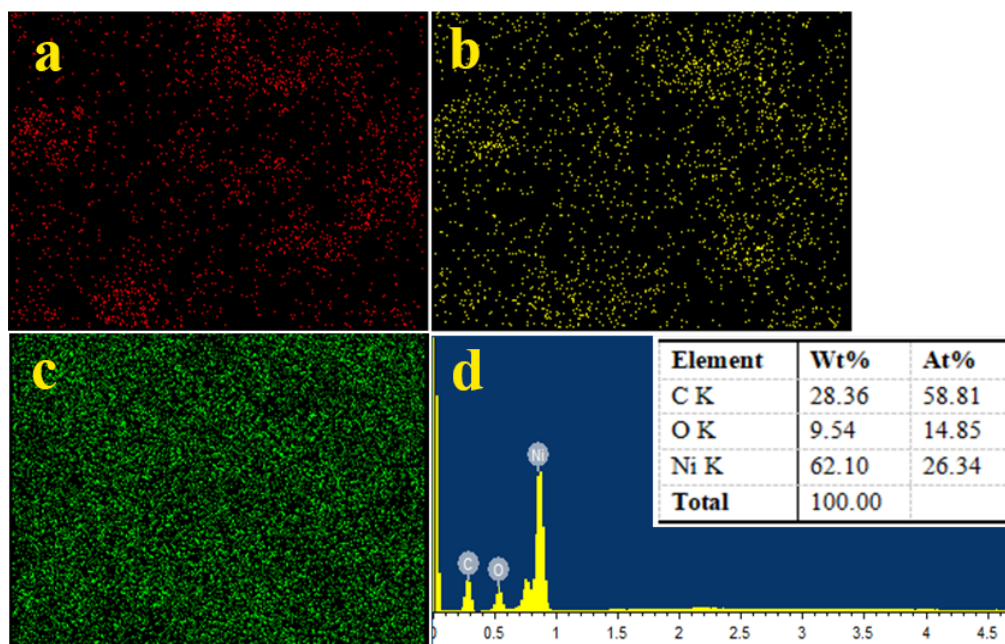

**Figure S5.** (a-c) Elemental mapping of individual elements (C, O, Ni) of image Figure 1,a. (d) EDS analysis of Ni(OH)<sub>2</sub>/Ni/rGO-1 composite coating.

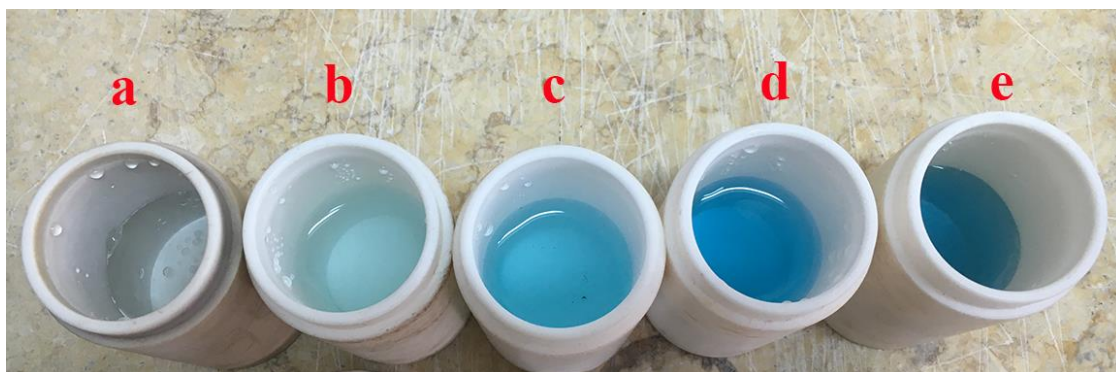

**Figure S6.** The digital photos of the color of the urea solution after hydrothermal process. The color of the urea solution changes obviously from colorless to dark blue. (a)  $\text{Ni(OH)}_2/\text{Ni/rGO-1}$ , (b)  $\text{Ni(OH)}_2/\text{Ni/rGO-2}$ , (c)  $\text{Ni(OH)}_2/\text{Ni/rGO-3}$ , (d)  $\text{Ni(OH)}_2/\text{Ni/rGO-4}$ , and (e)  $\text{Ni(OH)}_2/\text{Ni/rGO-5}$  composite catalysts.

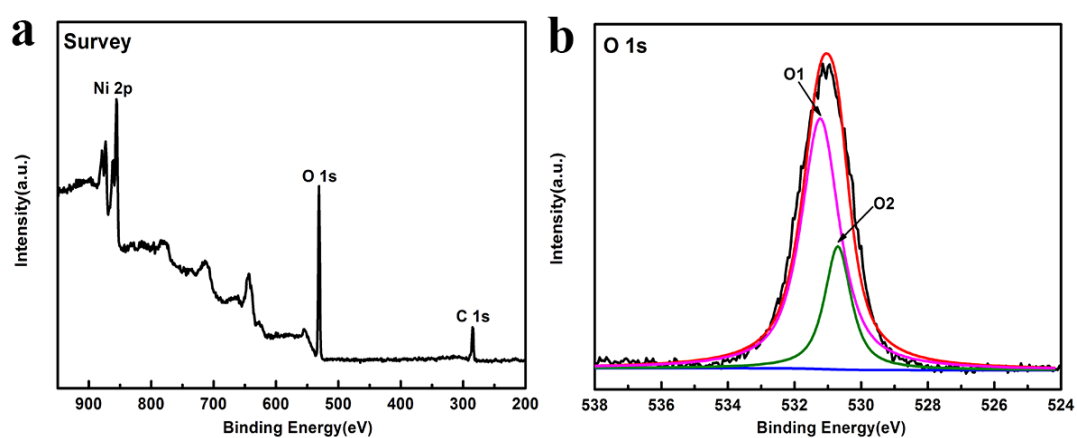

**Figure S7.** (a) XPS survey spectrum for  $\text{Ni(OH)}_2/\text{Ni/rGO-1}$ . (b) XPS spectrum of O 1s of  $\text{Ni(OH)}_2/\text{Ni/rGO-1}$  catalyst.

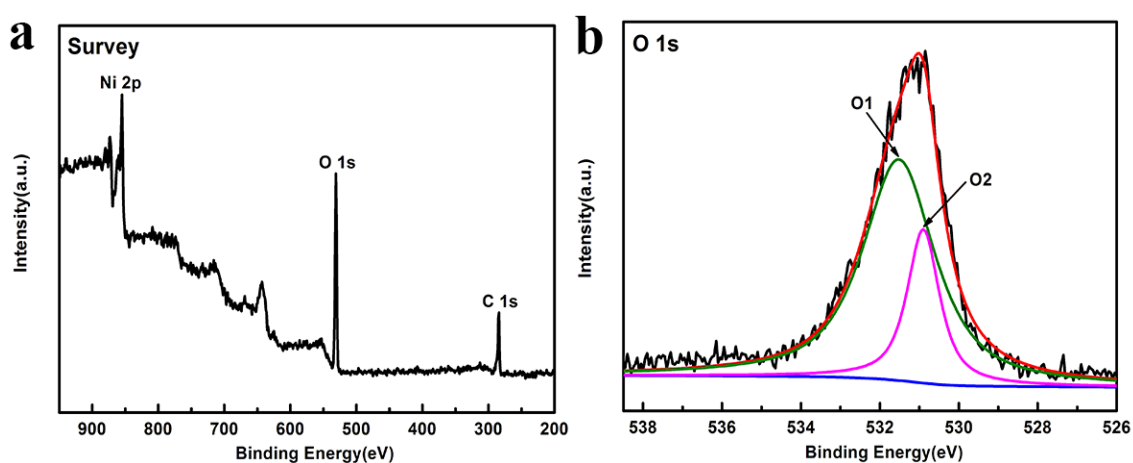

**Figure S8.** (a) XPS survey spectrum for  $\text{Ni(OH)}_2/\text{Ni/rGO-3}$ . (b) XPS spectrum of O 1s of  $\text{Ni(OH)}_2/\text{Ni/rGO-3}$  catalyst.

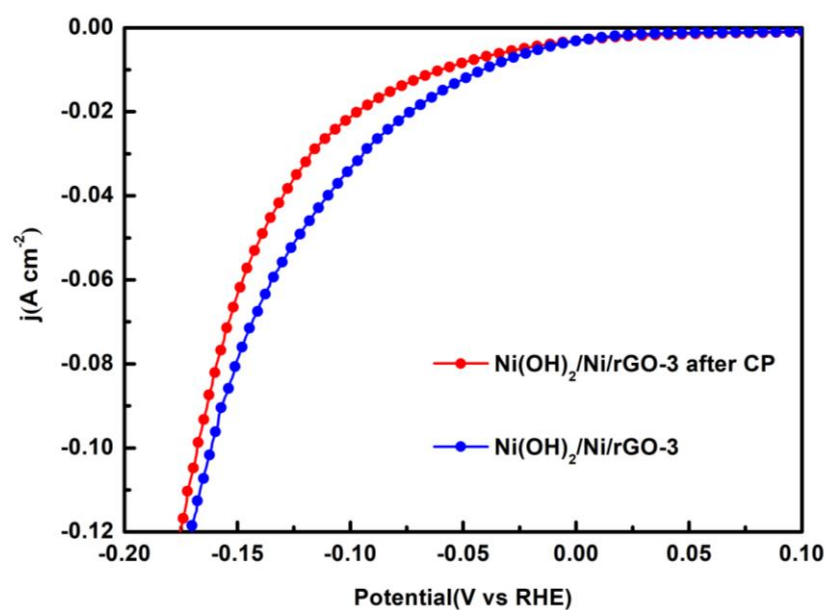

**Figure S9.** LSV curves for  $\text{Ni(OH)}_2/\text{Ni/rGO-3}$  before and after chronopotentiometry test.

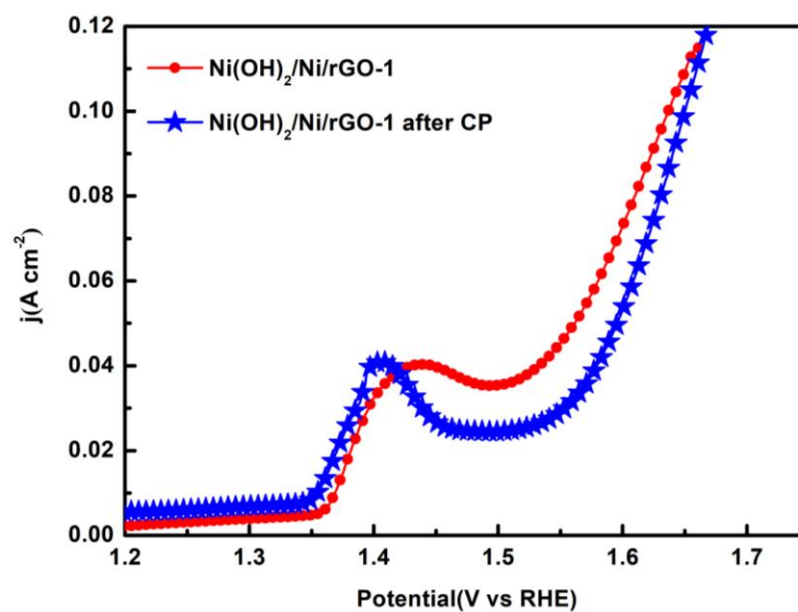

**Figure S10.** LSV curves for  $\text{Ni(OH)}_2/\text{Ni/rGO-1}$  before and after chronopotentiometry test.

**Table S1.** Comparison of electrocatalytic activity for HER, OER and EWS of diverse Ni-based catalysts in alkaline solution.

| Catalyst                                                         | Water electrolysis | Electrolyte | Current density         | Overpotential | Reference |
|------------------------------------------------------------------|--------------------|-------------|-------------------------|---------------|-----------|
| NiFe LDH-NS                                                      | HER                | 1 M KOH     | 20 mA cm <sup>-2</sup>  | 115 mV        | [2]       |
|                                                                  | OER                |             | 10 mA cm <sup>-2</sup>  | 210 mV        |           |
|                                                                  | EWS                |             | 20 mA cm <sup>-2</sup>  | 1.5 V         |           |
|                                                                  | EWS                |             | 10 mA cm <sup>-2</sup>  | 1.43 V        |           |
| FNHNS/NF                                                         | HER                | 1 M KOH     | 10 mA cm <sup>-2</sup>  | 140 mV        | [3]       |
|                                                                  | OER                |             | 10 mA cm <sup>-2</sup>  | 290 mV        |           |
|                                                                  | EWS                |             | 10 mA cm <sup>-2</sup>  | 1.55 V        |           |
| Ni(OH) <sub>2</sub> /NF                                          | HER                | 1 M KOH     | 10 mA cm <sup>-2</sup>  | 127 mV        | [4]       |
|                                                                  | HER                |             | 20 mA cm <sup>-2</sup>  | 172 mV        |           |
|                                                                  | OER                |             | 50 mA cm <sup>-2</sup>  | 330 mV        |           |
|                                                                  | EWS                |             | 10 mA cm <sup>-2</sup>  | 1.68V         |           |
|                                                                  | HER                |             | 10 mA cm <sup>-2</sup>  | 93mV          |           |
| NiP <sub>2</sub> /NiSe <sub>2</sub>                              | HER                | 1 M KOH     | 100 mA cm <sup>-2</sup> | 160 mV        | [5]       |
|                                                                  | OER                |             | 10 mA cm <sup>-2</sup>  | 253 mV        |           |
|                                                                  | EWS                |             | 10 mA cm <sup>-2</sup>  | 1.56 V        |           |
|                                                                  | HER                |             | 10 mA cm <sup>-2</sup>  | 32mV          |           |
| Mo <sub>2</sub> S <sub>3</sub> @NiMo <sub>3</sub> S <sub>4</sub> | HER                | 1 M KOH     | 100 mA cm <sup>-2</sup> | 124 mV        | [6]       |
|                                                                  | OER                |             | 10 mA cm <sup>-2</sup>  | 173 mV        |           |
|                                                                  | OER                |             | 100 mA cm <sup>-2</sup> | 256 mV        |           |
|                                                                  | EWS                |             | 500 mA cm <sup>-2</sup> | 1.639 V       |           |
|                                                                  | HER                |             | 100 mA cm <sup>-2</sup> | 305 mV        |           |
| NiCo <sub>2</sub> S <sub>4</sub> NA/CC                           | OER                | 1 M KOH     | 100 mA cm <sup>-2</sup> | 340 mV        | [7]       |
|                                                                  | EWS                |             | 10 mA cm <sup>-2</sup>  | 1.68 V        |           |

|                              |     |        |                         |          |           |
|------------------------------|-----|--------|-------------------------|----------|-----------|
|                              | HER |        | 20 mA cm <sup>-2</sup>  | 158 mV   |           |
| NiS/Ni foam                  | OER | 1M KOH | 50 mA cm <sup>-2</sup>  | 335 mV   | [8]       |
|                              | EWS |        | 10 mA cm <sup>-2</sup>  | 1.64 V   |           |
|                              | HER |        | 20 mA cm <sup>-2</sup>  | 255 mV   |           |
| Ni <sub>2</sub> P            | OER | 1M KOH | 10 mA cm <sup>-2</sup>  | 290 mV   | [9]       |
|                              | EWS |        | 10 mA cm <sup>-2</sup>  | 1.63 V   |           |
| NiMo                         | HER |        | 10 mA cm <sup>-2</sup>  | 92 mV    |           |
| HNRs/TiM                     | OER | 1M KOH | 50 mA cm <sup>-2</sup>  | 344 mV   | [10]      |
|                              | EWS |        | 10 mA cm <sup>-2</sup>  | 1.64 V   |           |
| Ni(OH) <sub>2</sub> /Ni/rGO- | OER |        | 10 mA cm <sup>-2</sup>  | 130 mV   |           |
| 1                            | OER | 1M KOH | 50 mA cm <sup>-2</sup>  | 331 mV   | This work |
|                              | OER |        | 100 mA cm <sup>-2</sup> | 407 mV   |           |
| Ni(OH) <sub>2</sub> /Ni/rGO- | HER |        | 10 mA cm <sup>-2</sup>  | 41 mV    |           |
| 3                            | HER | 1M KOH | 100 mA cm <sup>-2</sup> | 161.7 mV | This work |
| Ni(OH) <sub>2</sub> /Ni/rGO  | EWS | 1M KOH | 10 mA cm <sup>-2</sup>  | 1.43 V   |           |
|                              |     |        | 50 mA cm <sup>-2</sup>  | 1.48 V   | This work |

## References

- Wang, L.; Li, Y.; Xia, M.; Li, Z.; Chen, Z.; Ma, Z.; Qin, X.; Shao, G. Ni nanoparticles supported on graphene layers: An excellent 3D electrode for hydrogen evolution reaction in alkaline solution. *J. Power. Sources* **2017**, *347*, 220-228.
- Jia, Y.; Zhang, L.; Gao, G.; Chen, H.; Wang, B.; Zhou, J.; Soo, M.T.; Hong, M.; Yan, X.; Qian, G.; Zou, J. A heterostructure coupling of exfoliated Ni-Fe hydroxide nanosheet and defective graphene as a bifunctional electrocatalyst for overall water splitting. *Adv. Mater.* **2017**, *29*(17), 1700017.
- Liu, J.; Yang, Y.; Ni, B.; Li, H.; Wang, X. Fullerene-like nickel oxysulfide hollow nanospheres as bifunctional electrocatalysts for water splitting. *Small* **2017**, *13*(6), 1602637.
- Rao, Y.; Wang, Y.; Ning, H.; Li, P.; Wu, M. Hydrotalcite-like Ni(OH)<sub>2</sub> nanosheets in situ grown on nickel foam for overall water splitting. *Appl. Mater. Interfaces* **2016**, *8*(49), 33601-33607.
- Yang, L.; Huang, L.; Yao, Y.; Jiao, L. In-situ construction of lattice-matching NiP<sub>2</sub>/NiSe<sub>2</sub> heterointerfaces with electron redistribution for boosting overall water splitting. *Appl. Catal. B Environ.* **2021**, *282*, 119584.



6. Wu, T.; Xu, S.; Zhang, Z.; Luo, M.; Wang, R.; Tang, Y.; Wang, J.; Huang, F. Bimetal modulation stabilizing a metallic heterostructure for efficient overall water splitting at large current density. *Adv. Sci.* **2022**, *9*(25), 2202750.
7. Liu, D.; Lu, Q.; Luo, Y.; Sun, X.; Asiri, A.M. NiCo<sub>2</sub>S<sub>4</sub> nanowires array as an efficient bifunctional electrocatalyst for full water splitting with superior activity. *Nanoscale* **2015**, *7*(37), 15122-15126.
8. Zhu, W.; Yue, X.; Zhang, W.; Yu, S.; Zhang, Y.; Wang, J.; Wang, J. Nickel sulfide microsphere film on Ni foam as an efficient bifunctional electrocatalyst for overall water splitting. *Chem. Commun.* **2016**, *52*(7), 1486-1489.
9. Stern, L.A.; Feng, L.; Song, F.; Hu, X. Ni<sub>2</sub>P as a Janus catalyst for water splitting: The oxygen evolution activity of Ni<sub>2</sub>P nanoparticles. *Energy Environ. Sci.* **2015**, *8*(8), 2347-2351.
10. Tian, J.; Cheng, N.; Liu, Q.; Sun, X.; He, Y.; Asiri, A.M. Self-supported NiMo hollow nanorod array: An efficient 3D bifunctional catalytic electrode for overall water splitting. *J. Mater. Chem. A* **2015**, *3*(40), 20056-20059.
